# Supplementary material for: Income and neighbourhood deprivation in relation to obesity in urban dwelling children 0–12 years of age: a cross-sectional study from 2013 to 2019
Source: PubMed Central journal article supplement — J Epidemiol Community Health. 2021 Sep 6;76(3):274–80. doi: 10.1136/jech-2021-216455 (PMC8862044; doi:10.1136/jech-2021-216455), 2021-09-06
Supplement: jech-2021-216455supp001.pdf [file jech-2021-216455supp001.pdf]

Supplementary Table 1: Multi-level multinomial logistic regression model for the association between family income, neighbourhood income, neighbourhood deprivation and underweight, overweight, and obesity categories compared to normal weight in children aged 0-12 years

| Exposure variable                        | Girls<br>(adjusted for child age, sex, number of family members,<br>maternal ethnicity and income variables*)<br>OR (95% CI) |                          |                     | Boys<br>(adjusted for child age, sex, number of family members,<br>maternal ethnicity and income variables*)<br>OR (95% CI) |                          |                     |
|------------------------------------------|------------------------------------------------------------------------------------------------------------------------------|--------------------------|---------------------|-----------------------------------------------------------------------------------------------------------------------------|--------------------------|---------------------|
|                                          | Underweight<br>(zBMI<-2)                                                                                                     | Overweight<br>(1<zBMI≤2) | Obesity<br>(zBMI>2) | Underweight<br>(zBMI<-2)                                                                                                    | Overweight<br>(1<zBMI≤2) | Obesity<br>(zBMI>2) |
|                                          | Family income (CDN\$)                                                                                                        |                          |                     |                                                                                                                             |                          |                     |
| Q1 (<\$70,244)                           | 1.11 (0.57-2.16)                                                                                                             | 1.15 (0.74-1.79)         | 4.98 (1.84-13.49)   | 0.46 (0.22-0.95)                                                                                                            | 1.27 (0.84-1.93)         | 4.15 (2.00-8.63)    |
| Q2 (\$70,244-116,236)                    | 0.67 (0.32-1.38)                                                                                                             | 0.94 (0.62-1.43)         | 3.06 (1.13-8.32)    | 0.91 (0.50-1.68)                                                                                                            | 1.19 (0.82-1.71)         | 2.50 (1.22-5.10)    |
| Q3 (\$116,237-163,081)                   | 1.19 (0.63-2.25)                                                                                                             | 1.18 (0.80-1.74)         | 2.82 (1.04-7.64)    | 1.00 (0.55-1.84)                                                                                                            | 1.02 (0.70-1.48)         | 2.10 (1.01-4.37)    |
| Q4 (\$163,082-221,438)                   | 0.88 (0.44-1.76)                                                                                                             | 0.95 (0.64-1.40)         | 2.62 (0.98-7.04)    | 0.72 (0.38-1.39)                                                                                                            | 0.94 (0.65-1.36)         | 1.28 (0.59-2.79)    |
| Q5 (>\$221,438)                          | 1.00                                                                                                                         | 1.00                     | 1.00                | 1.00                                                                                                                        | 1.00                     | 1.00                |
| Neighbourhood level income<br>(CDN\$)    |                                                                                                                              |                          |                     |                                                                                                                             |                          |                     |
| Q1 (<\$62,336)                           | 1.01 (0.48-2.13)                                                                                                             | 0.73 (0.47-1.13)         | 1.00 (0.44-2.30)    | 1.89 (0.95-3.77)                                                                                                            | 1.00 (0.67-1.48)         | 1.72 (0.88-3.33)    |
| Q2 (\$62,336-80,383)                     | 1.47 (0.74-2.94)                                                                                                             | 0.75 (0.50-1.13)         | 0.93 (0.42-2.06)    | 1.90 (0.97-3.71)                                                                                                            | 0.95 (0.65-1.40)         | 0.86 (0.42-1.78)    |
| Q3 (\$80,384-96,109)                     | 0.77 (0.36-1.68)                                                                                                             | 0.86 (0.57-1.28)         | 0.75 (0.32-1.77)    | 1.22 (0.60-2.47)                                                                                                            | 0.76 (0.51-1.11)         | 1.22 (0.62-2.39)    |
| Q4 (\$96,110-116,607)                    | 1.67 (0.85-3.30)                                                                                                             | 0.90 (0.60-1.34)         | 0.82 (0.36-1.88)    | 1.41 (0.71-2.80)                                                                                                            | 1.00 (0.70-1.44)         | 1.37 (0.71-2.65)    |
| Q5 (>\$116,607)                          | 1.00                                                                                                                         | 1.00                     | 1.00                | 1.00                                                                                                                        | 1.00                     | 1.00                |
| Neighbourhood deprivation<br>(quintiles) |                                                                                                                              |                          |                     |                                                                                                                             |                          |                     |
| Q1 (most deprived)                       | 1.05 (0.52-2.14)                                                                                                             | 0.90 (0.56-1.46)         | 1.52 (0.69-3.31)    | 1.29 (0.62-2.66)                                                                                                            | 1.73 (1.16-2.59)         | 1.64 (0.86-3.11)    |
| Q2                                       | 1.24 (0.63-2.42)                                                                                                             | 0.89 (0.58-1.39)         | 0.92 (0.40-1.73)    | 1.31 (0.48-2.55)                                                                                                            | 1.29 (0.88-1.90)         | 1.57 (0.86-2.88)    |
| Q3                                       | 1.32 (0.71-2.46)                                                                                                             | 1.20 (0.83-1.73)         | 1.04 (0.49-2.20)    | 1.29 (0.68-2.40)                                                                                                            | 1.01 (0.70-1.45)         | 1.01 (0.55-1.87)    |
| Q4                                       | 1.56 (0.86-2.82)                                                                                                             | 1.02 (0.71-1.46)         | 0.75 (0.34-1.65)    | 1.77 (1.03-3.03)                                                                                                            | 1.16 (0.84-1.60)         | 0.90 (0.49-1.65)    |
| Q5 (least deprived)                      | 1.00                                                                                                                         | 1.00                     | 1.00                | 1.00                                                                                                                        | 1.00                     | 1.00                |

OR= Odds ratio, CI= Confidence interval, CDN\$= Canadian dollars. p-values for the interactions were: child sex\*family income p=0.59; child sex\*neighbourhood income p=0.69; and child sex\*neighbourhood deprivation p=0.56.

\*The model for family income was adjusted for the above-named variables plus neighbourhood income; The models for neighbourhood income and deprivation were each adjusted for the above-named variables and family income.
